# Supplementary material
Source: PubMed Central journal article supplement (PMC6987960)

**Supplementary Table 1: Items included in the four knowledge subscales**

| Knowledge Subscales          | Items (three answer options: “yes”, “no” and “don’t know”)                                                                             |
|------------------------------|----------------------------------------------------------------------------------------------------------------------------------------|
| Hearing Protection Use       | You do not need to wear earplugs if you work around loud noise only for five minutes.                                                  |
|                              | There are only a few styles of hearing protectors available.                                                                           |
|                              | Identification of noisy tasks around your farm should be done before you decide if you need to use hearing protection.                 |
|                              | How long the hearing protection needs to be used during a production activity depends on intensity of noise during that activity.      |
|                              | Distance from the source of noise is an important factor that determines whether and for how long hearing protection needs to be used. |
|                              | Every earplug is very flexible and can fit into any ear.                                                                               |
| Ways to Avoid Noise Exposure | A noise level meter can provide us enough information to make a decision whether hearing protection is needed.                         |
|                              | Keeping cab doors and windows closed is one way to minimize exposure to loud noise.                                                    |
|                              | The best way to avoid hearing loss is to reduce your exposure by using quieter equipment or staying away from noise.                   |
|                              | Well-lubricated equipment produces less noise.                                                                                         |
| Noise Intensity              | A "decibel" is the unit used to measure the loudness of noise.                                                                         |
|                              | If you are exposed to 85 dB for 8 hours it becomes dangerous to your ears.                                                             |
|                              | A grain dryer can generate noise over 100 dB.                                                                                          |
|                              | The noise intensity of a chain saw is not high enough to cause hearing loss in less than 4 minutes.                                    |
|                              | Different farm operations produce different noise intensities.                                                                         |
|                              | Squealing pigs produce much higher noise level than an open cab tractor.                                                               |
| General Hearing Health       | Hearing aids correct hearing the same way glasses correct vision.                                                                      |
|                              | Tinnitus (ringing in the ears) may show up before you even notice any hearing loss.                                                    |
|                              | Hearing loss cannot happen in younger farmers.                                                                                         |
|                              | Hearing loss caused by farm noise is preventable.                                                                                      |

**Supplementary Table 2: Items included in the three attitude subscales**

| <b>Subscales</b>       | <b>Items</b>                                                                                                                        |
|------------------------|-------------------------------------------------------------------------------------------------------------------------------------|
| Hearing Protection Use | If you are a farmer hearing protection is much more necessary compared to other people in your community who do not work on a farm. |
|                        | It is possible to protect my hearing even when I know the noise is too loud around me.                                              |
|                        | It is not difficult to buy hearing protections because they are very inexpensive.                                                   |
|                        | Ear plugs and ear muffs are more effective than simple cotton to prevent hearing loss.                                              |
|                        | We have hearing protection available at my worksite.                                                                                |
|                        | We need to measure noise levels during farm operations to decide if the noise level is harmful enough for hearing protection.       |
|                        | When to wear hearing protection is not an easy decision if I do not know the noise level of each task.                              |
| Self-Efficacy          | I know why I should use hearing protection.                                                                                         |
|                        | I know when I should use hearing protection.                                                                                        |
|                        | I know how long I should wear hearing protection during each farm activity that produces noise.                                     |
|                        | I know how to use hearing protection correctly.                                                                                     |
| Impact of Hearing Loss | Due to the noise produced during my farm activities I am more likely to lose my hearing in the future.                              |
|                        | If I have hearing loss it will interfere with my daily activities.                                                                  |
|                        | If I have hearing problem it will affect my ability to work.                                                                        |



**Supplementary Figure 1. Recruitment of participants in three intervention groups and study design.**

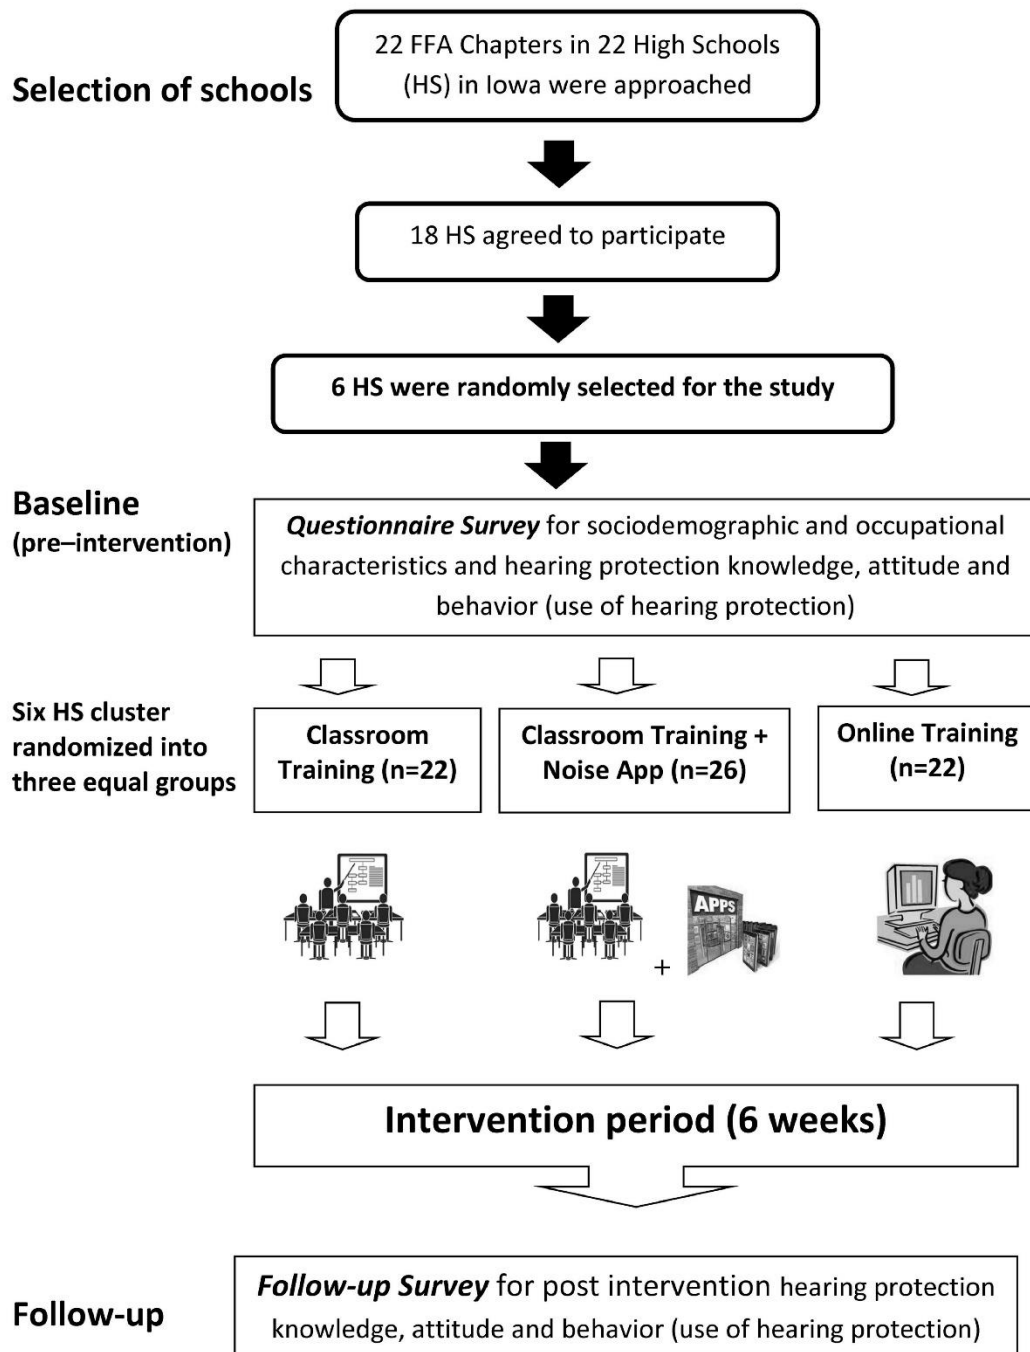

Supplement: NIHMS941455-supplement-1.pdf [file NIHMS941455-supplement-1.pdf]
